# Supplementary material for: Reduced Hypoglycemia and Increased Time in Target Using Closed-Loop Insulin Delivery During Nights With or Without Antecedent Afternoon Exercise in Type 1 Diabetes
Source: Oxford University Press journal article supplement (doi:10.2337/dc13-0010), 2013-06-12
Supplement: dc130010supplementarydata.pdf [file dc130010supplementarydata.pdf]

SUPPLEMENTARY DATA

**Supplemental Table 1.** Pre-dinner and Pre-Overnight Blood Glucose OL vs. CL control

| <b>Sedentary</b> | <b>OL-S</b> | <b>CL-S</b> | <b>p-value</b> |
|------------------|-------------|-------------|----------------|
| <b>5P.M.</b>     | 122 ± 54    | 130 ± 32    | 0.67           |
| <b>10P.M.</b>    | 159 ± 36    | 120 ± 30    | 0.003          |
| <b>Exercise</b>  | <b>OL-E</b> | <b>CL-E</b> | <b>p-value</b> |
| <b>5P.M.</b>     | 121 ± 56    | 100 ± 19    | 0.25           |
| <b>10P.m.</b>    | 146 ± 69    | 132 ± 45    | 0.49           |
